# Supplementary material for: Antinociceptive Efficacy of 15-Deoxy-Δ12,14-Prostaglandin J2 Therapy in Response to Experimentally Induced Temporomandibular Joint Arthritis: A Systematic Review of Studies in Rats
Source: MDPI journal article supplement (doi:10.3390/prosthesis6010005), 2024-01-10
Supplement: s1 [file s1]

Supplementary

**Table S1.** List of excluded studies with reason for exclusion.

| Authors et al. (Year)         | Title                                                                                                                                                                                                                         | Reason for Exclusion          |
|-------------------------------|-------------------------------------------------------------------------------------------------------------------------------------------------------------------------------------------------------------------------------|-------------------------------|
| Vaamonde-Garcia et al. (2019) | 15-Deoxy- $\Delta$ -12, 14-prostaglandin J2 acts cooperatively with prednisolone to reduce TGF- $\beta$ -induced pro-fibrotic pathways in human osteoarthritis fibroblasts.                                                   | Focused question not answered |
| Guan et al. (2015)            | The role of cyclooxygenase-2, interleukin-1 $\beta$ and fibroblast growth factor-2 in the activation of matrix metalloproteinase-1 in sheared-chondrocytes and articular cartilage.                                           | Focused question not answered |
| Sakaba et al. (2014)          | 15-Deoxy- $\Delta$ 12,14-prostaglandin J2 induces PPAR $\gamma$ - and p53-independent apoptosis in rabbit synovial cells.                                                                                                     | Focused question not answered |
| Wang et al. (2013)            | Fluid shear stress-induced osteoarthritis: roles of cyclooxygenase-2 and its metabolic products in inducing the expression of proinflammatory cytokines and matrix metalloproteinases.                                        | Review                        |
| Wang et al. (2012)            | The antagonistic actions of endogenous interleukin-1 $\beta$ and 15-deoxy- $\Delta$ 12,14-prostaglandin J2 regulate the temporal synthesis of matrix metalloproteinase-9 in sheared chondrocytes.                             | Focused question not answered |
| Lin et al. (2011)             | 15-deoxy- $\Delta$ (12,14) -prostaglandin-J2 and ciglitazone inhibit TNF- $\alpha$ -induced matrix metalloproteinase 13 production via the antagonism of NF- $\kappa$ B activation in human synovial fibroblasts.             | Focused question not answered |
| Wang et al. (2011)            | Interleukin-6 synthesis in human chondrocytes is regulated via the antagonistic actions of prostaglandin (PG)E2 and 15-deoxy- $\Delta$ (12,14)-PGJ2.                                                                          | Focused question not answered |
| Scher and Pillinger (2009)    | The anti-inflammatory effects of prostaglandins.                                                                                                                                                                              | Review article                |
| Hanks et al. (2010)           | Evaluation of anti-inflammatory and chondroprotective effects of peroxisome proliferator-activated receptor gamma agonists in cartilage and synovial explants from dogs.                                                      | Focused question not answered |
| Blaho et al. (2008)           | Arthritis develops but fails to resolve during inhibition of cyclooxygenase 2 in a murine model of Lyme disease.                                                                                                              | Focused question not answered |
| Yoon et al. (2007)            | ERK-1/-2 and p38 kinase oppositely regulate 15-deoxy-delta(12,14)-prostaglandinJ(2)-Induced PPAR-gamma activation that mediates dedifferentiation but not cyclooxygenase-2 expression in articular chondrocytes.              | Focused question not answered |
| Lee et al. (2007)             | 15-deoxy-Delta 12,14-ProstaglandinJ2 regulates dedifferentiation through peroxisome proliferator-activated receptor-gamma-dependent pathway but not COX-2 expression in articular chondrocytes.                               | Focused question not answered |
| Moulin et al. (2006)          | Effect of peroxisome proliferator activated receptor (PPAR)gamma agonists on prostaglandins cascade in joint cells.                                                                                                           | Focused question not answered |
| Hounoki et al. (2008)         | Activation of peroxisome proliferator-activated receptor gamma inhibits TNF-alpha-mediated osteoclast differentiation in human peripheral monocytes in part via suppression of monocyte chemoattractant protein-1 expression. | Focused question not answered |
| Li et al. (2005)              | Expression and regulation of microsomal prostaglandin E synthase-1 in human osteoarthritic cartilage and chondrocytes.                                                                                                        | Focused question not answered |
| Moulin et al. (2005)          | Rosiglitazone induces interleukin-1 receptor antagonist in interleukin-1beta-stimulated rat synovial fibroblasts via a peroxisome proliferator-activated receptor beta/delta-dependent mechanism.                             | Focused question not answered |

|                           |                                                                                                                                                                                                                            |                               |
|---------------------------|----------------------------------------------------------------------------------------------------------------------------------------------------------------------------------------------------------------------------|-------------------------------|
| Farrajota et al. (2005)   | Inhibition of interleukin-1 $\beta$ -induced cyclooxygenase 2 expression in human synovial fibroblasts by 15-deoxy-Delta12,14-prostaglandin J2 through a histone deacetylase-independent mechanism.                        | Focused question not answered |
| Masuko-Hongo K. (2005)    | Role of prostaglandins in rheumatoid arthritis.                                                                                                                                                                            | Review                        |
| Cheng et al. (2004)       | Activation of peroxisome proliferator-activated receptor gamma inhibits interleukin-1 $\beta$ -induced membrane-associated prostaglandin E2 synthase-1 expression in human synovial fibroblasts by interfering with Egr-1. | Focused question not answered |
| Relic et al. (2004)       | 15-deoxy-delta12,14-prostaglandin J2 inhibits Bay 11-7085-induced sustained extracellular signal-regulated kinase phosphorylation and apoptosis in human articular chondrocytes and synovial fibroblasts.                  | Focused question not answered |
| Shan et al. (2004)        | A potential role of 15-deoxy-delta(12,14)-prostaglandin J2 for induction of human articular chondrocyte apoptosis in arthritis                                                                                             | Focused question not answered |
| Kusunoki et al. (2004)    | Triptolide, an active compound identified in a traditional Chinese herb, induces apoptosis of rheumatoid synovial fibroblasts.                                                                                             | Focused question not answered |
| Bell-Parikh et al. (2003) | Biosynthesis of 15-deoxy-delta12,14-PGJ2 and the ligation of PPAR $\gamma$ .                                                                                                                                               | Focused question not answered |
| Simonin et al. (2002)     | PPAR- $\gamma$ ligands modulate effects of LPS in stimulated rat synovial fibroblasts.                                                                                                                                     | Focused question not answered |
| Cuzzocrea et al. (2002)   | The cyclopentenone prostaglandin 15-deoxy-Delta(12,14)-prostaglandin J(2) attenuates the development of acute and chronic inflammation.                                                                                    | Focused question not answered |
| Meynier et al. (2002)     | Design of a chimeric promoter induced by pro-inflammatory mediators in articular chondrocytes.                                                                                                                             | Focused question not answered |
| Fahmi et al. (2002)       | Peroxisome proliferator-activated receptor gamma activators inhibit MMP-1 production in human synovial fibroblasts likely by reducing the binding of the activator protein 1.                                              | Focused question not answered |
| Tsubouchi et al. (2001)   | Feedback control of the arachidonate cascade in rheumatoid synoviocytes by 15-deoxy-Delta(12,14)-prostaglandin J2.                                                                                                         | Focused question not answered |
| Kawahito et al. (2000)    | 15-deoxy-delta(12,14)-PGJ(2) induces synoviocyte apoptosis and suppresses adjuvant-induced arthritis in rats.                                                                                                              | Focused question not answered |
| Yotbuntueng et al. (2022) | Differential distribution of eicosanoids and polyunsaturated fatty acids in the Penaeus monodon male reproductive tract and their effects on total sperm counts.                                                           | Focused question not answered |
